# Supplementary material for: Synthesis of ultrathin WSe2 nanosheets and their high-performance catalysis for conversion of amines to imines
Source: Royal Society of Chemistry journal article supplement (doi:10.1039/c8nr05954c), 2018-01-01
Supplement: c8nr05954c1.pdf [file c8nr05954c1.pdf]

## **Supporting Information**

### **Synthesis of ultrathin WSe<sub>2</sub> nanosheets and their high-performance catalysis for conversion of amines to imines**

Bing-Qian Zhang, Jing-Shuai Chen, He-Lin Niu, Chang-Jie Mao, Ji-Ming Song\*

School of Chemistry & Chemical Engineering, Anhui Province Key Laboratory of Chemistry for Inorganic/Organic Hybrid Functionalized Materials, Anhui University, Hefei, Anhui 230601, PR China

Tel: +86 0551 63861279 ; Fax: +86 0551 63861279

E-mail: [jiming@ahu.edu.cn](mailto:jiming@ahu.edu.cn)

## Chemicals

Tungsten hexachloride ( $\text{WCl}_6$ , 99.9%), selenium powder (Se, 99.5%), oleylamine (OLA, 70%), oleic acid (OA, 90%), 1-dodecanethiol (1-DDT, 98%), 1-octadecene (ODE, 90%), N-Methyl-2-pyrrolidinone (NMP, 98%), p-benzoquinone (BQ, 98%), benzylamine ( $\text{C}_7\text{H}_9\text{N}$ , 99%), 2-methylbenzylamine ( $\text{C}_9\text{H}_{13}\text{N}$ , 98%), 4-methylbenzylamine ( $\text{C}_9\text{H}_{13}\text{N}$ , 98%), 4-chlorobenzylamine ( $\text{C}_7\text{H}_8\text{ClN}$ , 98%), 4-fluorobenzylamine ( $\text{C}_7\text{H}_8\text{FN}$ , 99%) and 2, 4-difluorobenzylamine ( $\text{C}_7\text{H}_7\text{F}_2\text{N}$ , 98%) were ordered from Aladdin Reagent Co. Ltd. Ethanol ( $\text{CH}_3\text{CH}_2\text{OH}$ , 99%), ethyl acetate ( $\text{C}_4\text{H}_8\text{O}_2$ , AR) and chloroform ( $\text{CHCl}_3$ , AR) were purchased from the Sinopharm Chemical Reagent Company. All chemicals were used as received without further purification.

## Instrumentation

The crystal phase was characterized by a Rigaku D/max-RA X-ray diffractometer (XRD). X-ray photoelectron spectroscopy (XPS) was performed by using a VG ESCA scientific theta probe spectrometer. The size and initial morphology of the product were measured using a JEOL-2100 transmission electron microscopy (TEM) and a Micro Nano AFM-III atomic force microscope (AFM). The diffuse reflectance spectra and fluorescence spectra of samples were recorded by a Shimadzu UV-3600 PC UV-vis spectrometer, a PerkinElmer LS-55 Fluorescence Spectrometer, respectively. The  $\text{N}_2$  adsorption-desorption isotherm of samples were measured by a Micromeritics ASAP2020M+C fully automatic specific surface and micro/mesoporous physical adsorption analyzer. The yield of benzylamine to imine was determined using a Shimadzu GC-2010 plus gas chromatography (GC) and a

Scientific TSQ 8000 EVO gas chromatography-mass spectrometry (GC-MS).

## Supplementary Figures and Tables

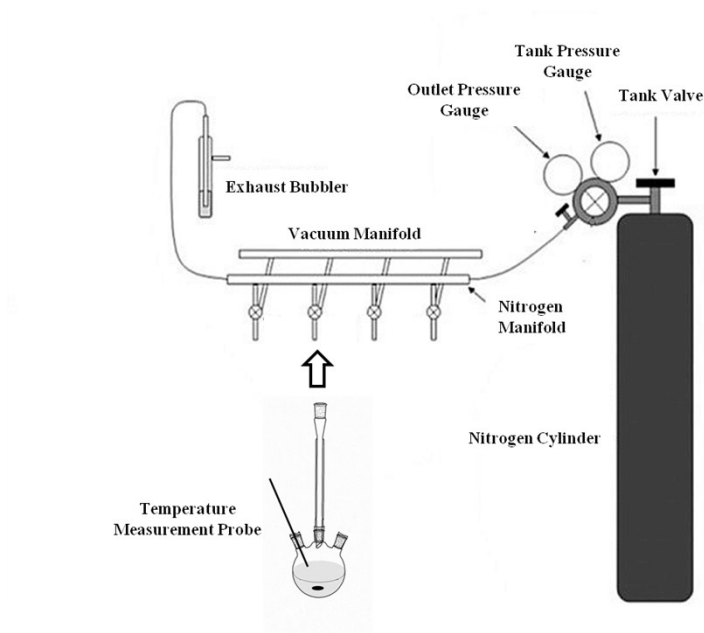

**Fig. S1.** Schematic diagram of the reaction device.

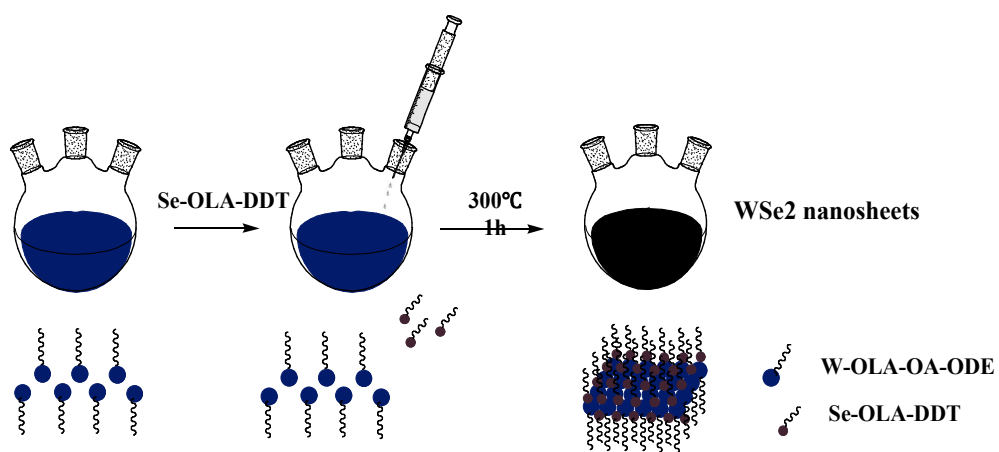

**Fig. S2.** Schematic illustration of the colloidal synthesis procedure of WSe<sub>2</sub> nanosheets

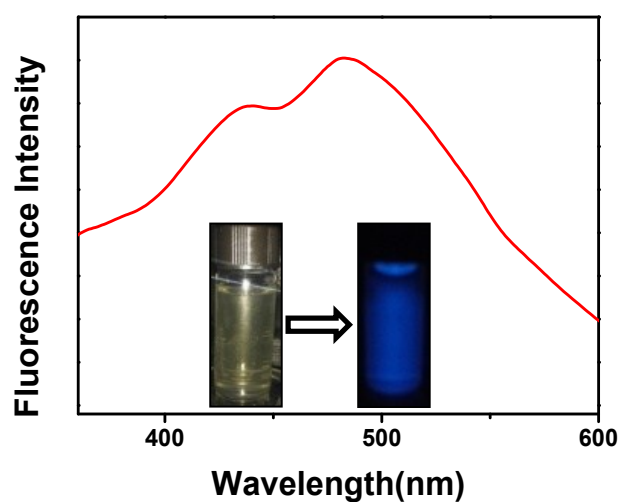

**Fig. S3.** fluorescence emission spectra of the WSe<sub>2</sub> nanosheets dispersed in solvent NMP excited by 380 nm, the inset shows photo pictures of WSe<sub>2</sub> solution without and with light irradiation.

**Table S1.** Photocatalytic aerobic benzylamine oxidation over the photocatalysts under different reaction conditions compared to the current literature.

| Catalyst                                             | Temp<br>(°C) | Oxygen<br>Source | Light Source                                  | Solvent      | Time<br>(h) | Yield<br>(%) | Ref       |
|------------------------------------------------------|--------------|------------------|-----------------------------------------------|--------------|-------------|--------------|-----------|
| WSe <sub>2</sub>                                     | 60           | air              | 5 W white LED lamp                            | water        | 24          | 100          | This work |
| AgI/AgVO <sub>3</sub>                                | -            | air              | 300 W Xe lamp<br>(>400 nm)                    | acetonitrile | 12          | 85           | 36        |
| Amorphous/crystalline Nb <sub>2</sub> O <sub>5</sub> | 80           | O <sub>2</sub>   | 100 W COB white<br>LED                        | acetonitrile | 8           | 93           | 37        |
| Conjugated Microporous                               | r.t.         | O <sub>2</sub>   | blue LED (460 nm)<br>(1.2 W/cm <sup>2</sup> ) | acetonitrile | 24          | >99          | 42        |

## Poly(Benzooxadiazol

## e) networks

|                                                         |      |                |                                                 |                     |    |    |    |
|---------------------------------------------------------|------|----------------|-------------------------------------------------|---------------------|----|----|----|
| WS <sub>2</sub>                                         | 50   | O <sub>2</sub> | 60 W white LED<br>lamp                          | acetonitrile        | 30 | 94 | 53 |
| Fe(bpy) <sub>3</sub> /npg-C <sub>3</sub> N <sub>4</sub> | -    | O <sub>2</sub> | 20 W white cold LED<br>(> 400 nm)               | acetonitrile        | 8  | 92 | 54 |
| Single-crystalline<br>TiO <sub>2</sub>                  | -    | O <sub>2</sub> | Xe lamp(>420nm)                                 | acetonitrile        | 4  | 73 | 55 |
| Hollow microporous<br>organic                           | r.t. | O <sub>2</sub> | blue LED ( 460 nm)<br>(0.8 mW/cm <sup>2</sup> ) | toluene             | 24 | 99 | 56 |
| NH <sub>2</sub> -MIL-125                                | -    | O <sub>2</sub> | 300 W Hg lamp<br>(>420 nm)                      | acetonitrile        | 12 | 63 | 57 |
| 5wt%Cu/graphene                                         | 40   | O <sub>2</sub> | 300 W Hg lamp (400-<br>800 nm)                  | absolute<br>ethanol | 6  | 92 | 58 |
| TiO <sub>2</sub> (B) /anatase<br>mixed phase            | 30   | air            | 300W Xe<br>lamp(>420nm)                         | acetonitrile        | 7  | 86 | 19 |

---

**Table S2.** The photocatalytic oxidation reaction of benzylamine into imine under solvent-free condition.

| Entry          | WSe <sub>2</sub> | Sel. (%) | Conv. (%) | Yield (mmol) |
|----------------|------------------|----------|-----------|--------------|
| 1              | ×                | -        | -         | -            |
| 2 <sup>a</sup> | √                | 49.02    | 15.24     | 1.04         |
| 3              | √                | 94.81    | 9.63      | 1.28         |

Reaction conditions: 3 ml of benzylamine, 30 mg catalyst, Air, 5 W white LED lamp, 60°C for 24 h, determined by GC.

<sup>a</sup> The reaction takes place under natural light with no extra light source.

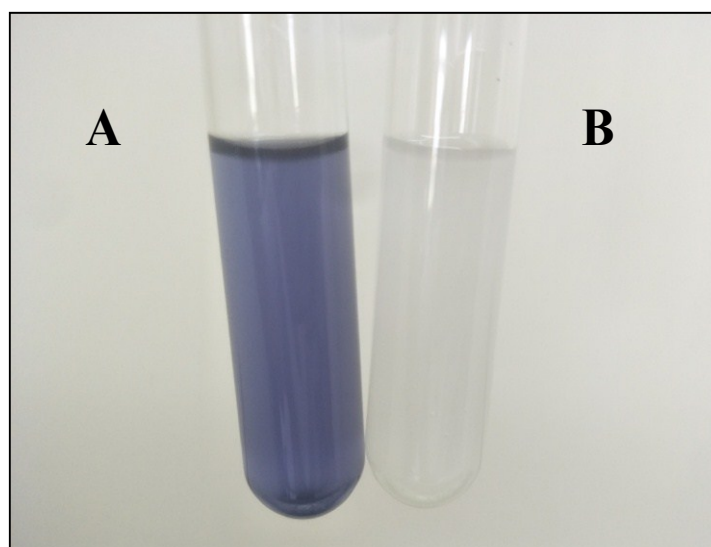

**Fig. S4.** H<sub>2</sub>O<sub>2</sub> qualitative detection: (A) reaction solution and (B) pure benzylamine solution reacts with potassium iodide for a period of time and then uses starch as an indicator.

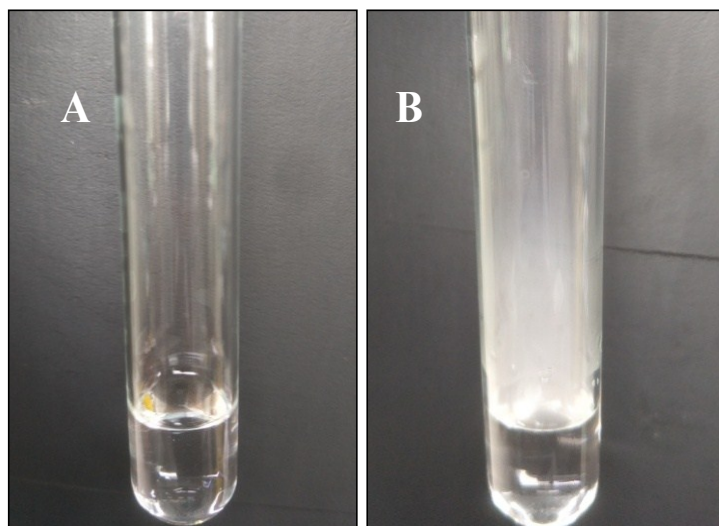

**Fig. S5.**  $\text{NH}_3$  qualitative detection: (A) reaction solution before adding the glass rod and (B) the formation of white fumes of ammonium chloride.

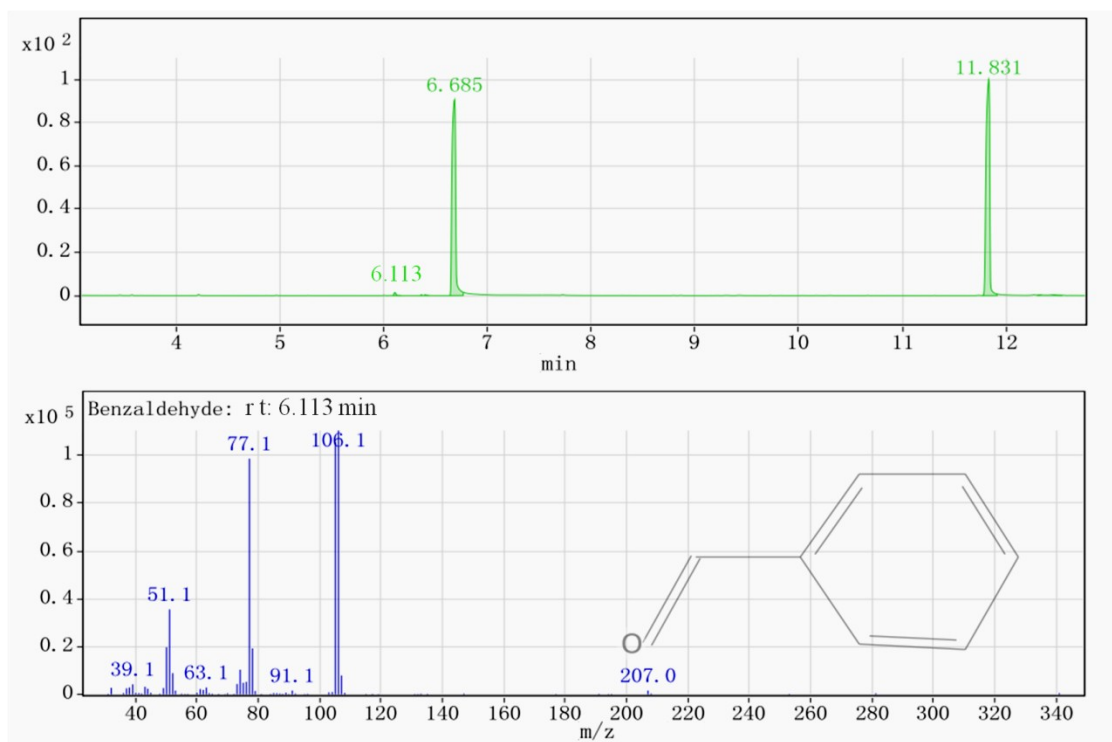

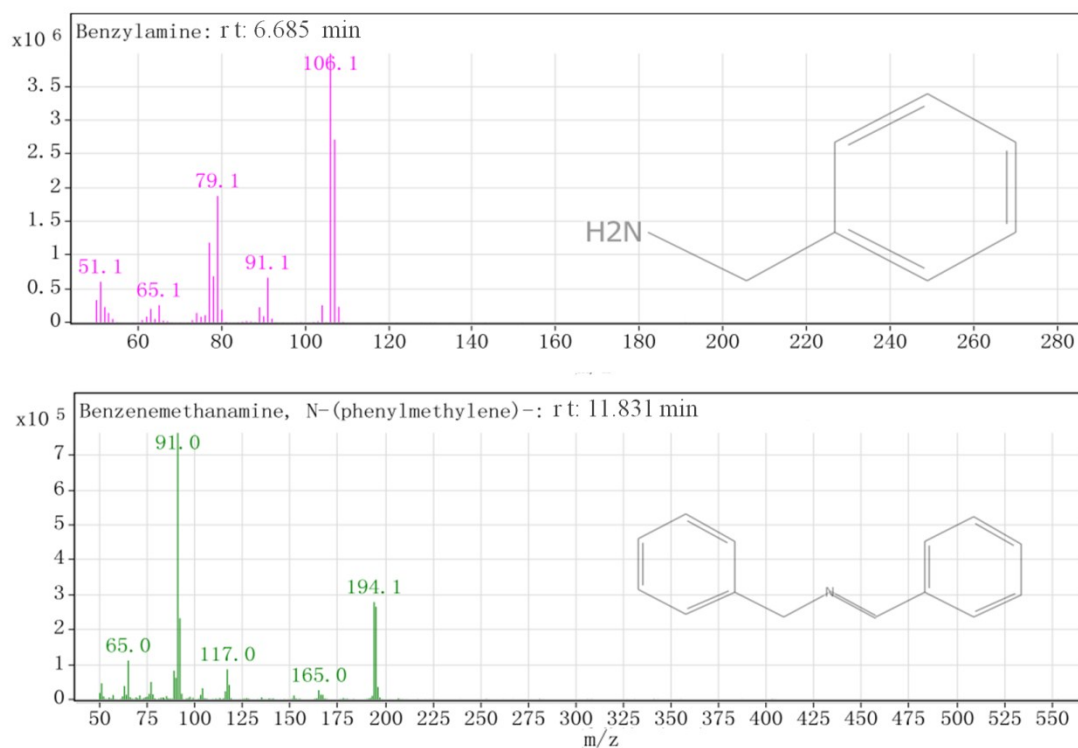

**Fig. S6.** GC-MS of the photochemical oxidation of benzylamine for 10 hours.

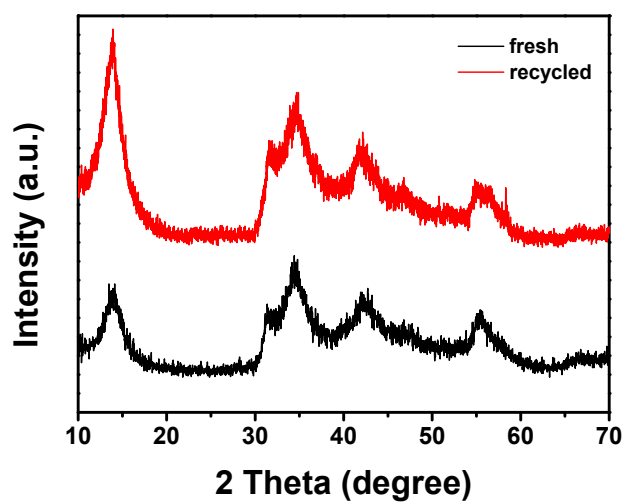

**Fig. S7.** The XRD patterns of WSe<sub>2</sub> nanosheets before and after undergoing 5 recycles.

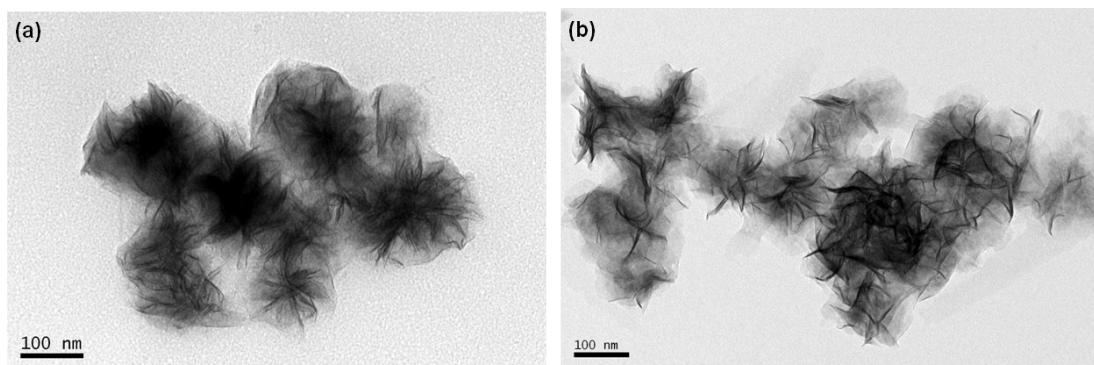

**Fig. S8.** The TEM images of WSe<sub>2</sub> nanosheets before (a) and after (b) undergoing 5 cycles.
